# Supplementary material for: Different regions of synaptic vesicle membrane regulate VAMP2 conformation for the SNARE assembly
Source: PubMed Central journal article supplement (PMC7093461; doi:10.1038/s41467-020-15270-4), 2020-03-24
Supplement: 41467_2020_15270_MOESM4_ESM.pdf [file 41467_2020_15270_MOESM4_ESM.pdf]

**Title:** Supplementary Data 1.

**Description:** Quantitative identification of lipids in lipid-raft and non-raft regions of SV membrane. Three separately isolated lipid-raft and non-raft samples (S) were quantified by MS-based lipidomic profiling. Isomers were numbered for differentiating the lipids' name.  $\text{pmol } \mu\text{g}^{-1}$ : each quantified lipid molecular species (pmol) was normalized by total proteins of the SVs ( $\mu\text{g}$ ). mol%: each quantified lipid molecular species (pmol) was normalized by total lipids of each sample (pmol). PC: Phosphatidylcholine; LPC: Lysophosphatidylcholine; PE: Phosphatidylethanolamine; LPE: Lysophosphatidylethanolamine; PS: Phosphatidylserine; PG: Phosphatidylglycerol; PI: Phosphatidylinositol; PA: Phosphatidic acid; Cer: Ceramide; SM: Sphingomyelins; TG: Triacylglycerols; Chol: Cholesterol.
